# Supplementary material for: HSPA12A attenuates lipopolysaccharide-induced liver injury through inhibiting caspase-11-mediated hepatocyte pyroptosis via PGC-1α-dependent acyloxyacyl hydrolase expression
Source: PubMed Central journal article supplement (PMC7429872; doi:10.1038/s41418-020-0536-x), 2020-04-24
Supplement: 41418_2020_536_MOESM1_ESM.pdf [file 41418_2020_536_MOESM1_ESM.pdf]

1

2

## Supplementary Materials

3

### 4 **1. Methods**

5

#### 6 **1.1 Dose-effects and time-course of LPS on hepatic HSPA12A expression and** 7 **injury in mice.**

8 Mice were treated with LPS for 6 h at the dosages of 2.5, 5, 10 and 20 mg/kg by  
9 intraperitoneally injection. In another set of experiments, mice were treated with 5  
10 mg/kg LPS by intraperitoneally injection for 3, 6, 12 and 24 h. Normal saline  
11 (NS)-treated mice were served as controls. At the end of experiments, serum was  
12 collected for measurements of alanine transaminase (ALT) and aspartate transaminase  
13 (AST) activities, and livers were collected for the examination of HSPA12A  
14 expression and Caspase-11 activation.

15

#### 16 **1.2 Dose-effects and time-course of LPS on HSPA12A expression and injury in** 17 **primary hepatocytes.**

18 Primary hepatocytes were incubated with LPS for 6 h at the dosages of 250, 500,  
19 1000 and 2000 ng/ml. In another set of experiments, primary hepatocytes were  
20 incubated with 500 ng/ml LPS for 3, 6, 12 and 24 h. NS-treated hepatocytes served as  
21 controls. At the end of experiments, culture medium was collected for measurements

22 of ALT and AST activities, and hepatocytes were collected for the examination of  
23 HSPA12A expression and Caspase-11 activation.

24

### 25 **1.3 Body temperature and animal activities**

26 Body temperature in mice was detected at 2, 4 and 6 h following LPS (5 mg/kg)  
27 treatment using a rectal probe. Animal activities were also evaluated at 2, 4 and 6 h  
28 following LPS (5 mg/kg) treatment according to previous methods <sup>1</sup>. The  
29 measurements before LPS treatment served as baseline controls. In brief, the scoring  
30 system of activity includes two principal tasks: hunched posture and spontaneous  
31 rapid movements interspersed with eating and drinking. The scoring system ranged  
32 from 0 to 4, in which 4 (normal) denotes that mice intersperse movement  
33 spontaneously and rapidly with eating and drinking but without hunched posture, and  
34 0 (severe) is continual hunched posture without movement. The investigator was  
35 blinded to the treatment.

36

### 37 **1.4 Measurement of Blood pressure, blood gas, blood creatinine (Cr) and urea- 38 nitrogen (Urea) *Noninvasive blood pressure.***

39 Six hours after LPS (5 mg/kg) or NS treatment, mouse systolic blood pressure  
40 (SBP) was measured using a non-invasive tail cuff computerized system (ACL-NIBP,  
41 Alcott Biotech, China) as described in our previous study <sup>2</sup>. All the measured mice  
42 were pre-trained for 5 consecutive days in the pre-warmed tail-cuff device to

43 accustom them to the procedure. The investigator was blinded to the treatment.

44 ***Blood gas analysis.*** Six hours after LPS (5 mg/kg) or NS treatment, mice were  
45 anesthetized (1.5% isoflurane), intubated and mechanically ventilated. Arterial blood  
46 was drawn from the left ventricle for blood gas measurements, including blood  
47 oxygen saturation (SO<sub>2</sub>), partial pressure of blood oxygen (pO<sub>2</sub>), and partial pressure  
48 of blood carbon dioxide pressure (pCO<sub>2</sub>) using iSTAT Analyzer MN:300 (Abbott Park,  
49 IL).

50 ***Blood creatinine (Cr) and urea-nitrogen (Urea).*** Six hours after LPS (5 mg/kg)  
51 or NS treatment, serum was separated for the analyses of Cr and Urea using a  
52 Beckman Coulter AU5800 Chemistry System analyzer (Brea, CA).

53

## 54 **1.5 Animal mortality**

55 Mice were checked every 30 min within 6 h after LPS (5 mg/kg) treatment. The  
56 investigator was blinded to the treatment.

57

## 58 **1.6 Histological examination of spleen and intestine**

59 Six hours after LPS (5 mg/kg) or NS treatment, spleens and intestines were  
60 collected for paraffin-embedded sections. Hematoxylin and Eosin (H&E) staining  
61 was performed subsequently according to previous methods <sup>3,4,5,6</sup>.

62

## 63 **1.7 Time-course of LPS accumulation in primary hepatocytes**

64 Primary hepatocytes were incubated with FITC-LPS (500 ng/ml) for 3, 6, 12, and  
65 24 h. At the end of experiments, cells were collected for Hoechst33342 staining to  
66 indicate nuclei. The stained fluorescence was observed and quantified using a  
67 fluorescence microscope. Data was expressed as FITC fluorescence  
68 intensity\*10<sup>3</sup>/mm<sup>2</sup> cell area.

69

### 70 **1.8 Lactic acid dehydrogenase (LDH) leakage from LPS-treated primary** 71 **hepatocytes**

72 Primary hepatocytes were incubated with LPS (500 ng/ml) for 6 h. At the end of  
73 experiments, culture medium was collected for LDH activity analysis using the LDH  
74 assay kit according to our previous methods <sup>7</sup>.

75

76

77

78 **2. Figure legends**

79

80 **Figure S1. Dose-effect and time-course of LPS on HSPA12A expression in mouse**  
81 **livers *in vivo* and primary hepatocytes *in vitro*.**

82 Mice (A) or primary hepatocytes (C) were treated with LPS for 6 h at the  
83 indicated concentrations. In other sets of experiments, mice were treated with 5 mg/kg  
84 LPS (B) or primary hepatocytes were incubated with 500 ng/ml LPS (D) for the  
85 indicated durations. Mouse livers or primary hepatocytes were collected for  
86 HSPA12A expression analysis by immunoblotting. Blots for GAPDH or Lamin A/C  
87 served as loading controls. Data are mean  $\pm$  SD, \*\*  $P < 0.01$  and \*  $P < 0.05$  vs. NS  
88 control by one-way ANOVA followed by Tukey's test. n =3/group.

89

90 **Figure S2. *Hspa12a* mRNA expression in hepatocytes.**

91 *Hspa12a* mRNA expression was examined in primary hepatocytes after  
92 incubation with LPS or NS for 6 h using real-time PCR. Data are mean  $\pm$  SD. n =  
93 6/group.

94

95 **Figure S3. Body temperature, activity, SBP, blood gas, blood Urea and Cr, and**  
96 **mortality of mice.**

97 Mice were treated with LPS (5 mg/kg) for 6 h. The indicated measurements were  
98 performed. Data are mean  $\pm$  SD. \*\*  $P < 0.01$  vs. basal control by one-way ANOVA

99 followed by Tukey's test (A, B), or \*\*  $P < 0.01$  and \*  $P < 0.05$  by Student's two-tailed  
100 unpaired  $t$  test (C-E). Survival rate was analyzed by log-rank test (F).  $n = 6$ /group (A,  
101 B),  $n = 4$ /group (C),  $n = 3$ /group (D),  $n = 8-14$ /group (E), and  $n = 10$ /group (F).

102

103 **Figure S4. Dose-effect and time-course of LPS on liver injury.**

104 A. Mice were treated with LPS for 6 h at the indicated concentrations. Livers were  
105 collected for Caspase-11 activation using immunoblotting.

106 B. Mice were treated with 5 mg/kg LPS for the indicated durations. Livers were  
107 collected for Caspase-11 activation using immunoblotting.

108 C. Mice were treated with LPS for 6 h at the indicated concentrations. Serum was  
109 collected for ALT and AST activity analysis.

110 D. Mice were treated with 5 mg/kg LPS for the indicated durations. Serum was  
111 collected for ALT and AST activity analysis.

112 Data are mean  $\pm$  SD, \*\*  $P < 0.01$  vs. NS control by one-way ANOVA followed by  
113 Tukey's test.  $n = 3$ /group (A, B) and  $n = 4$ /group (C, D).

114

115 **Figure S5. Dose-effect and time-course of LPS on primary hepatocyte injury.**

116 A. Primary hepatocytes were treated with LPS for 6 h at the indicated concentrations.  
117 Caspase-11 activation was examined using immunoblotting.

118 B. Primary hepatocytes were treated with 500 ng/ml LPS for the indicated durations.  
119 Caspase-11 activation was examined using immunoblotting.

120 C. Primary hepatocytes were treated with LPS for 6 h at the indicated concentrations.

121 Culture medium was collected for ALT and AST activity analysis.

122 D. Primary hepatocytes were treated with 500 ng/ml LPS for the indicated durations.

123 Culture medium was collected for ALT and AST activity analysis.

124 Data are mean  $\pm$  SD, \*\*  $P < 0.01$  and \*  $P < 0.05$  vs. NS control by one-way

125 ANOVA followed by Tukey's test. n = 3/group (A, B), n = 6/group (C), n = 4-6/group

126 (D).

127

128 **Figure S6. Serum ALT and AST activities.**

129 Mice were treated with 5 mg/kg LPS for the 6 h (n = 10/group) and 24 h (n =

130 3/group), respectively. Serum was collected for ALT and AST activity analysis. Data

131 are mean  $\pm$  SD, \*\*  $P < 0.01$  and \*  $P < 0.05$  by two-way ANOVA followed by Tukey's

132 test.

133

134 **Figure S7. Body temperature and animal activities.**

135 Mice were treated with 5 mg/kg LPS 6 h. Body temperature and animal activities

136 were measured. Data are mean  $\pm$  SD, \*\*  $P < 0.01$  and \*  $P < 0.05$  vs. the time

137 matched-*Hspa12a*<sup>-/-</sup> mice by two-way ANOVA followed by Tukey's test. n = 6/group.

138

139 **Figure S8. Organ examination following LPS treatment.**

140 Mice were treated with 5 mg/kg LPS 6 h. Blood gas (A, n = 3-5/group), Urea and

141 Cr (B, n = 8-14/group) was analyzed. Also, histology of spleen (C, n = 3/group) and

142 intestine (D, n = 3/group) was examined by H&E staining on paraffin-embedded  
143 sections. Data are mean  $\pm$  SD, \*\*  $P < 0.01$  and \*  $P < 0.05$  by two-way ANOVA  
144 followed by Tukey's test. Scale bar = 100  $\mu$ M.

145

146 **Figure S9. HSPA12A deficiency increased LPS contents in serum of mice.**

147 Six-hours after FITC-LPS treatment, serum were collected from mice. LPS  
148 abundance in serum was indicated by the FITC fluorescence intensity (arbitrary unites)  
149 that measured by a fluorometer at excitation/emission wavelengths of 490/530 nm.  
150 Data are mean  $\pm$  SD, \*\*  $P < 0.01$  by Student's two-tailed unpaired  $t$  test. n = 5/group.

151

152 **Figure S10. Time-course of LPS accumulation in primary hepatocytes.**

153 After incubation with FITC-LPS (500 ng/ml) for the indicated durations, the  
154 primary hepatocytes were counter stained with Hoechst33342. The staining was  
155 observed and quantified using a fluorescence microscope. Data was expressed as  
156 FITC fluorescence intensity  $\times 10^3/\text{mm}^2$  cell area. Data are mean  $\pm$  SD, \*\*  $P < 0.01$  or  
157 \*  $P < 0.05$  vs. 3 h control by one-way ANOVA followed by Tukey's test. n =3/group.  
158 Scale bar = 20  $\mu$ M.

159

160 **Figure S11. LPS and vesicle staining.**

161 After incubation with FITC-LPS (500 ng/ml) for 6 h, the primary hepatocytes  
162 were immunofluorescence stained for a vesicle marker Flotillin-1. Hoechst33342  
163 was used to counterstain nuclei. The staining was observed using a fluorescence



164 microscope. n =3/group. Scale bar = 10  $\mu$ M.

165

166 **Figure S12. LDH activity in culture medium.**

167 After incubation with LPS or NS for 6 h, the medium of primary hepatocyte  
168 cultures were collected for LDH activity assay. Data are mean  $\pm$  SD, \*\*  $P < 0.01$  or \*  
169  $P < 0.05$  by two-way ANOVA followed by Tukey's test. n =3/group.

170

171 **Figure S13. Effects of Caspase-11 knockdown on cytosolic LPS accumulation.**

172 Caspase-11 in primary hepatocytes was knocked-down by si-RNA (A). After  
173 incubation with FITC-LPS for 6, the primary hepatocytes were counter stained with  
174 Hoechst33342. The staining was observed and quantified using a fluorescence  
175 microscope. Data was expressed as FITC fluorescence intensity  $\times 10^3/\text{mm}^2$  cell area.  
176 Data are mean  $\pm$  SD, \*\*  $P < 0.01$  by Student's two-tailed unpaired  $t$  test (A) or  
177 two-way ANOVA followed by Tukey's test (B). n = 3/group. NS., no significance.  
178 Scale bar = 20  $\mu$ M.

179

180 **Figure S14. *Aoah* mRNA expression.**

181 WT primary hepatocytes were infected with *Hspa12a*-adenovirus to overexpress  
182 HSPA12A (*Hspa12a<sup>o/e</sup>*). WT hepatocytes infected empty virus served as negative  
183 controls (NC). After incubation with LPS for 6 h, *Aoah* mRNA was evaluated using  
184 real-time PCR. Data are mean  $\pm$  SD, \*  $P < 0.05$  by Student's two-tailed unpaired  $t$  test.  
185 n = 6 for WT group and n =5 for *Hspa12a<sup>o/e</sup>* group.

186 **Figure S15. Schematic represents construction of adenovirus containing mouse**  
187 **AOAH expression sequence.**

188 Full length of mouse *Aoah* CDS was inserted in the multiple clonal sites (MCS).

189

190

### 191 **3. References**

192 1. Walley KR, Thain KR, Russell JA, Reilly MP, Meyer NJ, Ferguson JF, *et al.* PCSK9 is a critical  
193 regulator of the innate immune response and septic shock outcome. *Sci Transl Med* 2014,  
194 **6(258): 258ra143.**

195

196 2. Zhou H, Qian J, Li C, Li J, Zhang X, Ding Z, *et al.* Attenuation of cardiac dysfunction by HSPA12B  
197 in endotoxin-induced sepsis in mice through a PI3K-dependent mechanism. *Cardiovasc Res*  
198 2011, **89(1): 109-118.**

199

200 3. Nezic L, Amidzic L, Skrbic R, Gajanin R, Nepovimova E, Valis M, *et al.* Simvastatin Inhibits  
201 Endotoxin-Induced Apoptosis in Liver and Spleen Through Up-Regulation of  
202 Survivin/NF-kappaB/p65 Expression. *Front Pharmacol* 2019, **10: 54.**

203

204 4. Arima H, Hirate H, Sugiura T, Suzuki S, Takahashi S, Sobue K. IV injection of polystyrene beads  
205 for mouse model of sepsis causes severe glomerular injury. *J Intensive Care* 2014, **2(1): 21.**

206

207 5. Guo S, Nighot M, Al-Sadi R, Alhmoud T, Nighot P, Ma TY. Lipopolysaccharide Regulation of  
208 Intestinal Tight Junction Permeability Is Mediated by TLR4 Signal Transduction Pathway  
209 Activation of FAK and MyD88. *J Immunol* 2015, **195(10): 4999-5010.**

210

211 6. Gunther C, Buchen B, He GW, Hornef M, Torow N, Neumann H, *et al.* Caspase-8 controls the  
212 gut response to microbial challenges by Tnf-alpha-dependent and independent pathways.  
213 *Gut* 2015, **64(4): 601-610.**

214

215 7. Ma R, Wang X, Lu C, Li C, Cheng Y, Ding G, *et al.* Dexamethasone attenuated  
216 bupivacaine-induced neuron injury in vitro through a threonine-serine protein kinase  
217 B-dependent mechanism. *Neuroscience* 2010, **167(2): 329-342.**

218

219
